# Supplementary material for: α-ketoglutarate dehydrogenase inhibition counteracts breast cancer-associated lung metastasis
Source: Springer Nature journal article supplement (doi:10.1038/s41419-018-0802-8), 2018-07-09
Supplement: MOESM2 [file 41419_2018_802_MOESM2_ESM.pdf]

**Supplemental Table 1.** Metastasis associated genes regulated by AA6 treatment compared to saline control depicted in Figure 2a.

|         | <b>Fold change</b> | <b>p value</b> |
|---------|--------------------|----------------|
| Fat1    | 0,546              | 0,002          |
| Gpnmb   | 0,284              | 0,007          |
| Tcf20   | 0,705              | 0,010          |
| Src     | 0,409              | 0,014          |
| Met     | 2,193              | 0,018          |
| Ctbp1   | 0,335              | 0,018          |
| Il18    | 1,792              | 0,020          |
| Brms1   | 0,768              | 0,025          |
| Apc     | 2,242              | 0,030          |
| Lpar6   | 2,216              | 0,045          |
| Mmp3    | 0,328              | 0,050          |
| Cdh11   | 3,658              | 0,064          |
| Smad2   | 0,734              | 0,078          |
| Plaur   | 0,473              | 0,078          |
| Tnfsf10 | 3,752              | 0,111          |
| Fn1     | 1,605              | 0,119          |
| Tgfb1   | 0,723              | 0,148          |
| Hras    | 0,770              | 0,154          |
| Ewsr1   | 0,732              | 0,156          |
| Col4a2  | 0,704              | 0,176          |
| Cd44    | 0,698              | 0,179          |
| Myc     | 1,541              | 0,181          |
| Pnn     | 1,170              | 0,194          |
| Vegfa   | 0,480              | 0,205          |
| Cdh6    | 0,376              | 0,209          |
| Hgf     | 1,920              | 0,234          |
| Nme2    | 1,176              | 0,256          |
| Nf2     | 0,854              | 0,320          |
| Htatip2 | 0,747              | 0,340          |
| Cd82    | 1,158              | 0,341          |
| Csf1    | 0,805              | 0,397          |
| Cxcr2   | 0,610              | 0,420          |
| Mdm2    | 1,162              | 0,445          |
| Mmp7    | 0,638              | 0,451          |
| Il1b    | 1,079              | 0,475          |
| Mta1    | 1,127              | 0,482          |
| Itgb3   | 0,898              | 0,487          |
| Mmp13   | 1,065              | 0,489          |
| Nme1    | 0,875              | 0,518          |
| Trp53   | 0,960              | 0,584          |
| Ctsl    | 0,739              | 0,585          |
| Smad4   | 1,082              | 0,666          |
| Fgfr4   | 1,295              | 0,668          |
| Nr4a3   | 1,193              | 0,676          |
| Etv4    | 1,140              | 0,680          |
| Ctnna1  | 1,094              | 0,693          |
| Mmp10   | 1,031              | 0,714          |

|       |       |       |
|-------|-------|-------|
| Mtss1 | 0,943 | 0,798 |
| Rpsa  | 1,066 | 0,838 |
| Syk   | 1,177 | 0,915 |
| Chd4  | 1,089 | 0,929 |
| Mmp9  | 1,379 | 0,938 |
| Timp2 | 0,991 | 0,954 |
